# Supplementary material for: Bimodal self-assembly of an amphiphilic gelator into a hydrogel-nanocatalyst and an organogel with different morphologies and photophysical properties
Source: Royal Society of Chemistry journal article supplement (doi:10.1039/c6cc06971a), 2016-01-01
Supplement: c6cc06971a1.pdf [file c6cc06971a1.pdf]

## Supporting Information

### **Bimodal self-assembly of an amphiphilic gelator to hydrogel-nanocatalyst and organogel of different morphologies and photophysical properties**

Papri Sutar and Tapas Kumar Maji\*

*Molecular Materials Laboratory, Chemistry and Physics of Materials Unit, Jawaharlal  
Nehru Centre for Advanced Scientific Research, Jakkur, Bangalore 560 064, India,  
Email: tmaji@jncasr.ac.in*

#### **1. Experimental Section.**

**1.1 Materials and Methods:** 1,3,5-tris(bromomethyl)benzene, methyl 4-hydroxybenzoate, 4'-chloro-2,2':6',2''-terpyridine, 1,3-diaminopropane, triphenylphosphine (PPh<sub>3</sub>), trichloroisocyanuric acid (TCIC) were purchased from Sigma-Aldrich chemical Co. Ltd. Potassium carbonate, potassium iodide, malononitrile and all solvents were purchased from Spectrochem. For doing catalysis all substrates, benzaldehyde, 4-nitrobenzaldehyde, 4-chlorobenzaldehyde, p-tolualdehyde and p-anisaldehyde, were purchased from Sigma-Aldrich chemical Co. Ltd. All solvents were pre-dried using standard procedures before using. For UV-Vis experiments spectroscopic grade solvents were purchased from Spectrochem. <sup>1</sup>H NMR is recorded on a Bruker AV-400 spectrometer with chemical shifts recorded as ppm and all spectra were calibrated against TMS. UV-Vis spectra were recorded in a Perkin-Elmer lamda 900 spectrometer. Fluorescence studies were accomplished using Perkin Elmer Ls 55 Lumeniscence spectrometer. Infrared spectral studies were carried out by making samples with KBr pellets using Bruker FT-IR spectrometer. Powder X-ray diffraction studies were recorded on a Bruker D8 discover instrument using Cu-K $\alpha$  radiation.

Morphology studies were carried out using Lica-S440I field emission scanning electron microscopy (FESEM) by placing samples on silicon wafer under vacuum with accelerating voltage of 10 kV. Transmission electron microscopy (TEM) analysis was performed using JOEL JEM-3010 with accelerating voltage of 300kV. For this analysis the xerogel was dispersed in ethanol and then drop casted on a carbon coated copper grid.

**1.2 Synthesis of 4,4',4''-[1,3,5-phenyl-tri(methoxy)]-tris-benzoic acid:** methyl 4-hydroxybenzoate (1.065 g, 7 mmol), potassium carbonate ( 2.89 g, 21 mmol), potassium iodide (85 mg, 0.518 mmol) were suspended in dry N, N-dimethylformamide (DMF). The reaction mixture was refluxed at 100 °C for 2 hours maintaining the inert condition. 1,3,5-tris(bromomethyl)benzene (500 mg, 1.4 mmol) was dissolved in 20 ml dry DMF and was dropwise added to the above heated reaction mixture. The mixture was subsequently stirred and heated at 100 °C for 4 hours. After cooling the reaction mixture to room temperature, 100 ml of distilled water was added and the precipitate formed was collected by filtration. The precipitate was washed several times with cold distilled water and air dried. A white solid was obtained with 85% yield. The product was taken in a round bottom flux. 40 ml methanol and 6 g of NaOH in 20 ml of distilled water was added into it. The reaction mixture was refluxed at 50 °C for 12 hours. After cooling to room temperature, the solution was placed in a ice bath and acidified to pH 2 with 3N HCl. The precipitate was then collected, washed several times with distilled water and air dried. A brownish solid was obtained with 98% yield. <sup>1</sup>H-NMR (400 MHz, DMSO-*d*<sup>6</sup>) δ: 7.89 (d, 6H, ArH), 7.53 (s, 3H, ArH), 7.11 (d, 6H, ArH), 5.22 (s, 6H, CH<sub>2</sub>). Selected FTIR data (KBr, cm<sup>-1</sup>): 3451 (b), 3078-2879 (s), 2673 (s), 2550 (s), 1680 (sh), 1603 (sh), 1510 (m), 1428 (m), 1248 (sh), 1169 (sh), 1009 (m), 940 (s), 846 (m), 771 (m), 695 (s), 648 (s), 609 (s), 564 (s), 504 (s).

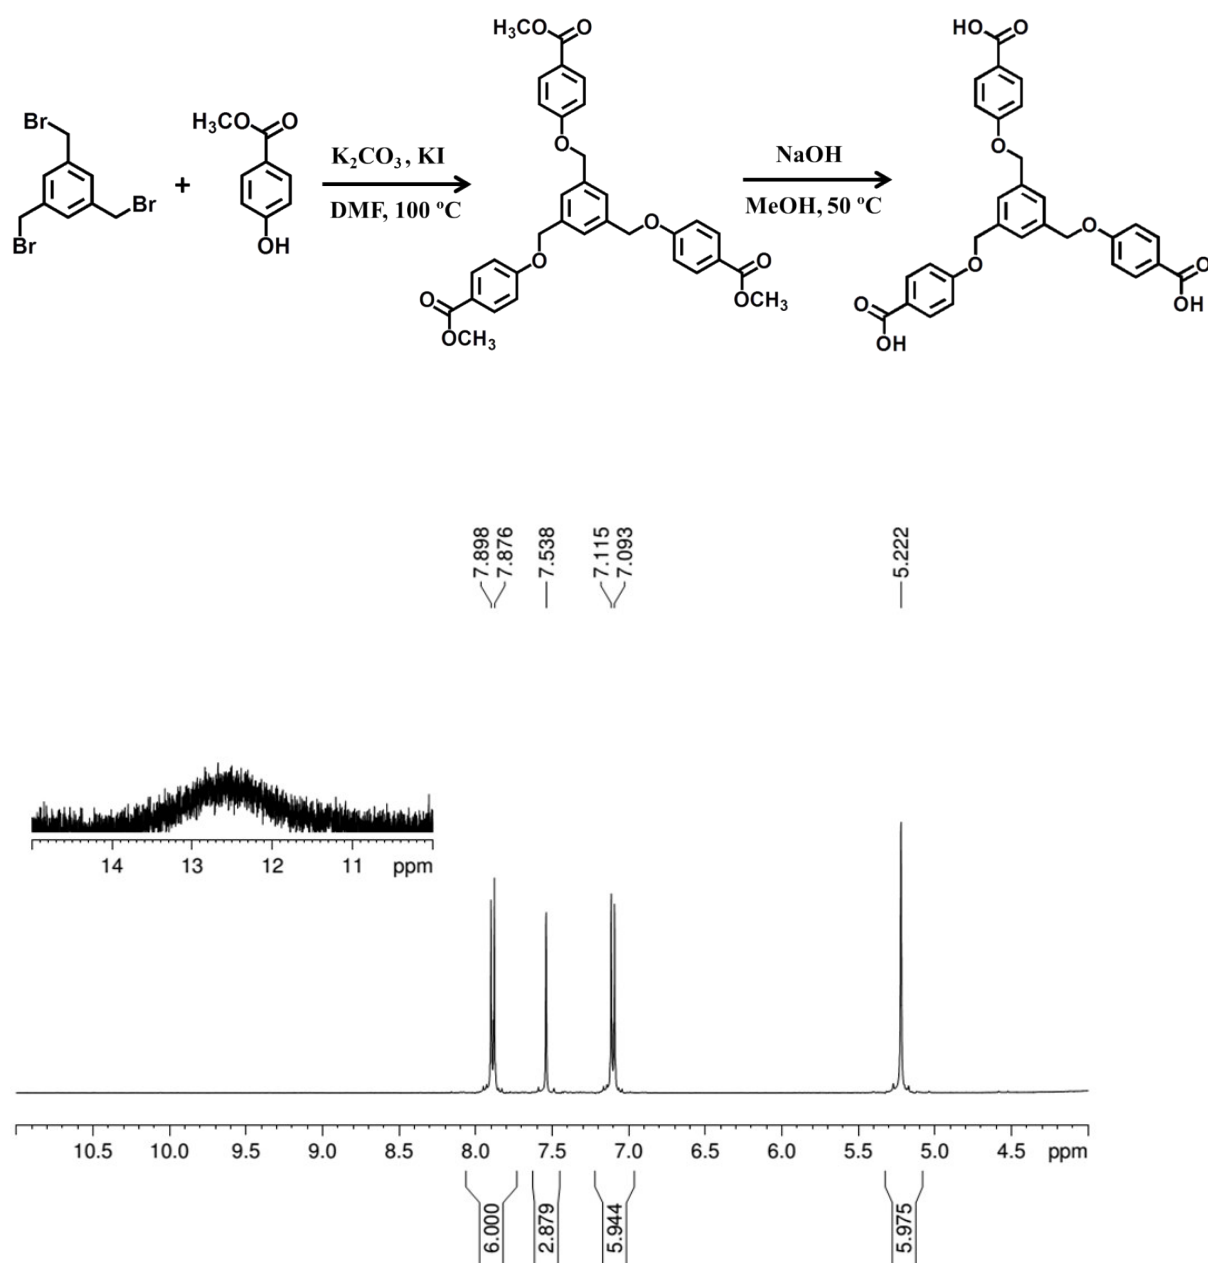

**Fig. S1**  $^1H$  NMR spectra of 4,4',4''-[1,3,5-phenyl-tri(methoxy)]-tris-benzoic acid in DMSO- $d_6$ .

**1.3 Synthesis of 2,2';6',2''-terpyridin-4'-yl-propane-1,3-diamine:** 2,2';6',2''-terpyridin-4'-yl-propane-1,3-diamine was synthesized by following a reported procedure. 4'-chloro-2,2':6',2''-terpyridine, (300 mg, 1.12 mmol) was suspended in 1,3-diamino propane (2.16 ml). The reaction mixture was then refluxed at  $120^\circ C$  for overnight. After cooling to room temperature,  $H_2O$  (25 mL) was added. The white precipitate formed was filtered and further

washed with H<sub>2</sub>O. The solid was dissolved in dichloromethane and extracted twice with H<sub>2</sub>O. The organic layers were combined and dried over Na<sub>2</sub>SO<sub>4</sub>, filtered and the solvent was removed under reduced pressure to yield a white solid product. Yield: 82%. <sup>1</sup>H-NMR (400 MHz, CDCl<sub>3</sub>): δ: 8.53 (d, 2H, ArH), 8.52 (d, 2H, ArH), 7.76 (t, 2H, ArH), 7.60 (s, 2H, ArH), 7.25 (t, 2H, ArH), 5.16 (t, 1H, NH), 3.41 (m, 2H, NHCH<sub>2</sub>), 2.84 (m, 2H, CH<sub>2</sub>), 1.77 (m, 2H, NH<sub>2</sub>CH<sub>2</sub>). Selected FTIR data (KBr, cm<sup>-1</sup>): 3340 (b), 2965 (m), 1610-1560 (s), 1464 (m), 1402 (m), 1261 (m), 1094-981 (s), 791 (s).

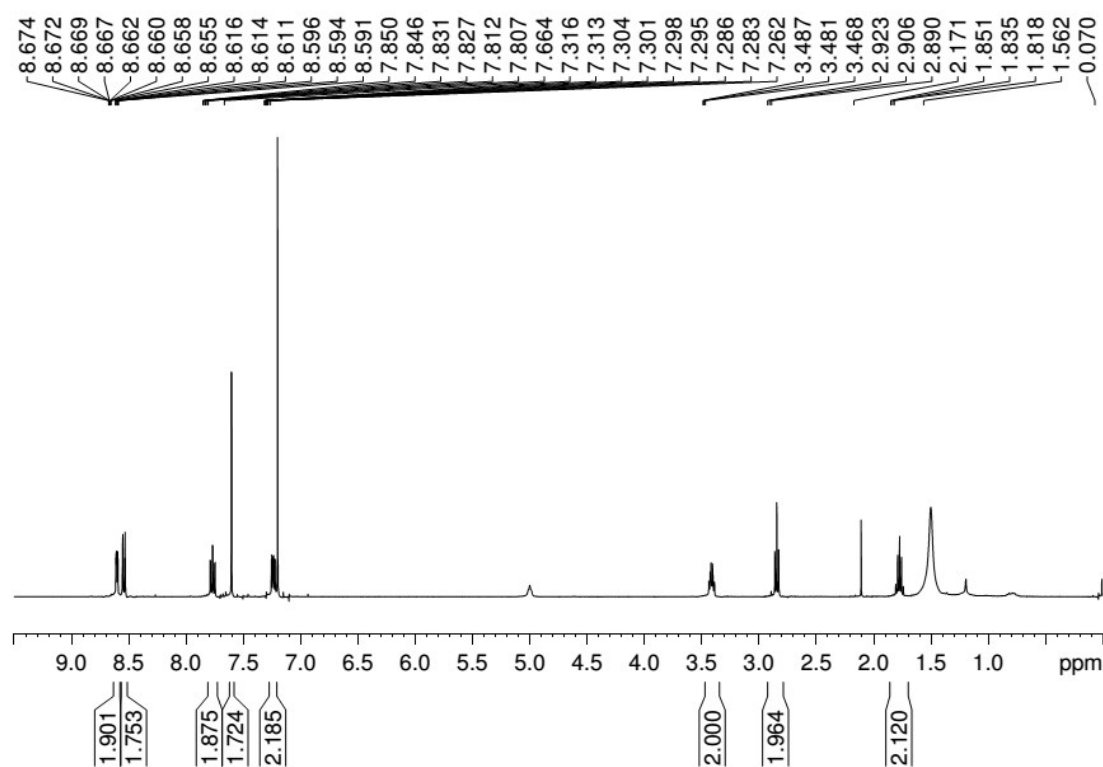

**Fig. S2** <sup>1</sup>H-NMR spectra of 2,2';6',2''-terpyridin-4'-yl-propane-1,3-diamine in CDCl<sub>3</sub> solvent.

**1.4 Synthesis of 4,4',4''-[1,3,5-phenyl-tri(methoxy)]-tris-benzene{[3-([2,2';6',2''-terpyridin-4'-ylamino)-propyl]-amide}(L):** 4,4',4''-[1,3,5-phenyl-tri(methoxy)]-tris-benzoic acid (280 mg, 0.529 mmol) was dissolved in anhydrous THF (30 mL). TCIC (406 mg, 1.748 mmol) and PPh<sub>3</sub>(458 mg, 1.748 mmol) were added into the reaction mixture

and stirred at 0 °C for 40 min under inert condition. 2,2';6',2''-terpyridin-4'-yl-propane-1,3-diamine (532 mg, 1.748 mmol) was dissolved in anhydrous THF ( 20 ml) and Et<sub>3</sub>N (484 µl, 3.496 mmol) was added into it. This reaction mixture was drop-wise added into 4,4',4''-[1,3,5-phenyl-tri(methoxy)]-tris-benzoic acid / TCIC/ PPh<sub>3</sub> solution at 0 °C and stirred for 45 minutes. After that the reaction mixture was stirred at room temperature for 3 hrs. Precipitate was collected by filtration and washed several times with CHCl<sub>3</sub> and dried under reduced pressure. Yield: 88%. <sup>1</sup>H-NMR (400 MHz, DMSO-*d*<sup>6</sup>) δ: 8.65 (d, 2H, ArH), 8.89 (d, 2H, ArH), 8.23 (m, 2H, ArH), 7.90 (s, 2H, ArH), 7.78 (m, 2H, ArH), 7.73 (m, 2H, ArH), 7.53 (s, 1H, ArH), 7.05 (d, 2H, ArH), 5.21 (s, 2H, ArCH<sub>2</sub>OAr), 3.72 (m, 2H, CONHCH<sub>2</sub>), 3.02 (m, 2H, CH<sub>2</sub>), 2.04 (m, 2H, CH<sub>2</sub>NH). Selected FTIR data (KBr, cm<sup>-1</sup>): 3436 (b), 3039 (b), 2779 (s), 2676 (s), 2493 (s), 1721 (sh), 1695(sh), 1600 (m), 1470 (m), 1399 (m), 1249 (s), 1167 (s), 850 (s), 790 (m), 534 (m).

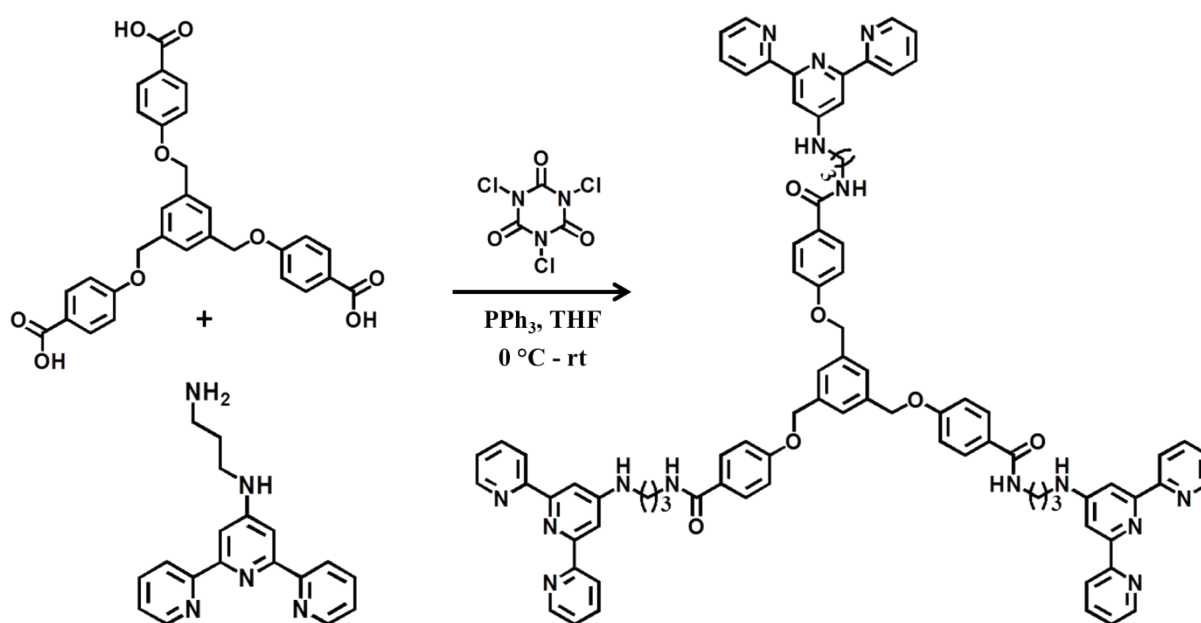

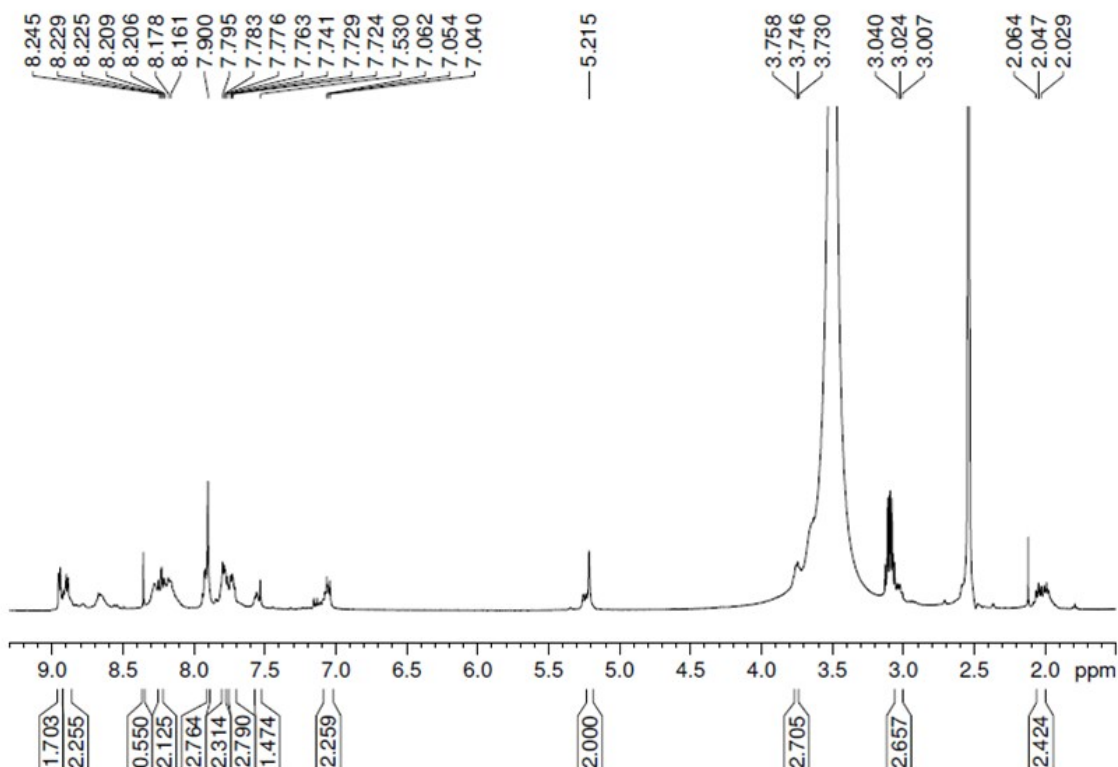

**Fig. S3**  $^1\text{H}$ -NMR spectra of **L** in  $\text{DMSO}-d^6$  solvent.

**1.5 Synthesis of HG:** 9 mg **L** was dissolved in 600  $\mu\text{l}$  MeOH and 400  $\mu\text{l}$  water was added into the solution during sonication. The mixture was kept at room temperature. After 5-6 min opaque gel was formed. The formation of gel was confirmed by inversion-test method. The **HG** xerogel is prepared by drying the hydrogel in air. Selected IR data of **HG** xerogel (KBr,  $\text{cm}^{-1}$ ): 3436 (b), 3040 (b), 2781 (s), 2679 (s), 2493 (s), 1722 (sh), 1693 (sh), 1594 (m), 1469 (m), 1398 (m), 1248 (s), 1055 (s), 851 (s), 788 (m), 537 (m).

**1.6 Synthesis of OG:** 8 mg of **L** was dissolved in 800  $\mu\text{l}$   $\text{CHCl}_3/\text{THF}$  (v:v= 1:1) mixture was heated at  $90^\circ\text{C}$  for few minutes to form a viscous liquid which on cooling resulted in opaque gel. The formation of gel was confirmed by inversion test method. **OG** xerogel is prepared by drying the organogel in air. Selected IR data of **OG** xerogel (KBr,  $\text{cm}^{-1}$ ): 3420 (b), 3053 (b), 2778 (m), 1716 (sh), 1688(sh), 1465 (m), 1396 (sh), 1052 (m), 771 (s), 534 (sh).

**1.7 General procedure for the catalytic reactions:** Benzaldehyde derivatives (1 mmol) and melanonitrile (1 mmol) were taken in a Schlenk tube and 15 ml dry THF was added into it under inert atmosphere. The reaction mixture was stirred at room temperature for 5 minutes and **HG** xerogel (1 mol %) was added into it. After that the reaction mixture was refluxed at 40 °C under nitrogen atmosphere. The reaction mixture was cooled down to room temperature and filtered to recover the catalyst. The filtrate was concentrated and analysed using GC-MS analyser and  $^1\text{H}$  NMR spectroscopy.

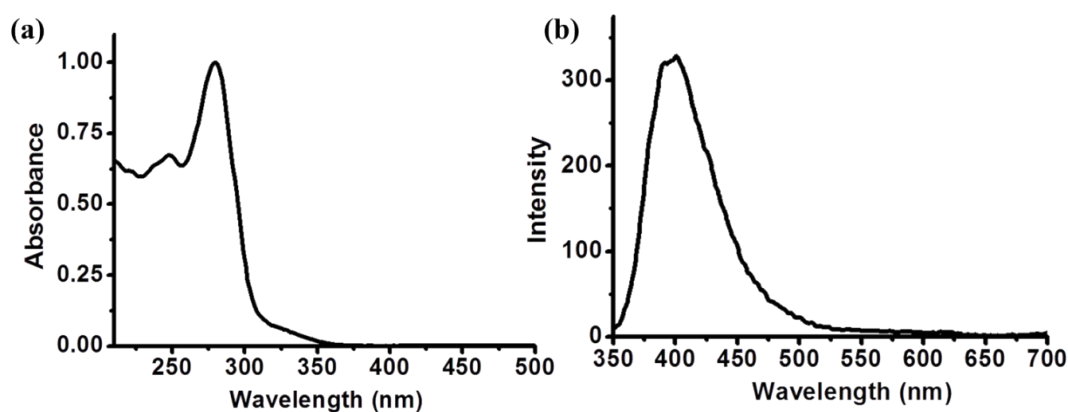

**Fig. S4** (a) Absorption spectra of 2,2';6',2''-terpyridin-4'-yl-propane-1,3-diamine ( $1 \times 10^{-4}$  M) in  $\text{CHCl}_3$ , (b) emission spectra of 2,2';6',2''-terpyridin-4'-yl-propane-1,3-diamine ( $1 \times 10^{-4}$  M) in  $\text{CHCl}_3$ .

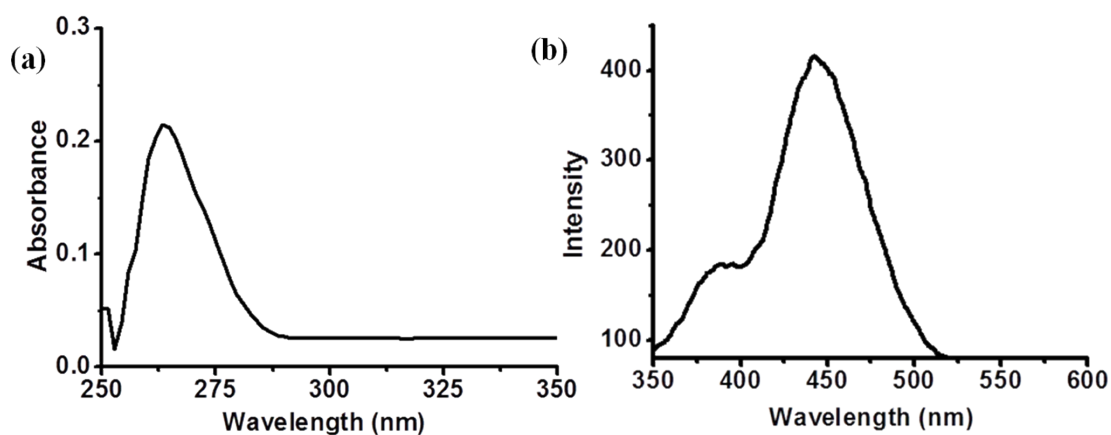

**Fig. S5** (a) Absorption spectra of 4,4',4''-[1,3,5-phenyl-tri(methoxy)]-tris-benzoic acid ( $1 \times 10^{-4}$  M) in DMSO, (b) emission spectra of 4,4',4''-[1,3,5-phenyl-tri(methoxy)]-tris-benzoic acid ( $1 \times 10^{-4}$  M) in DMSO.

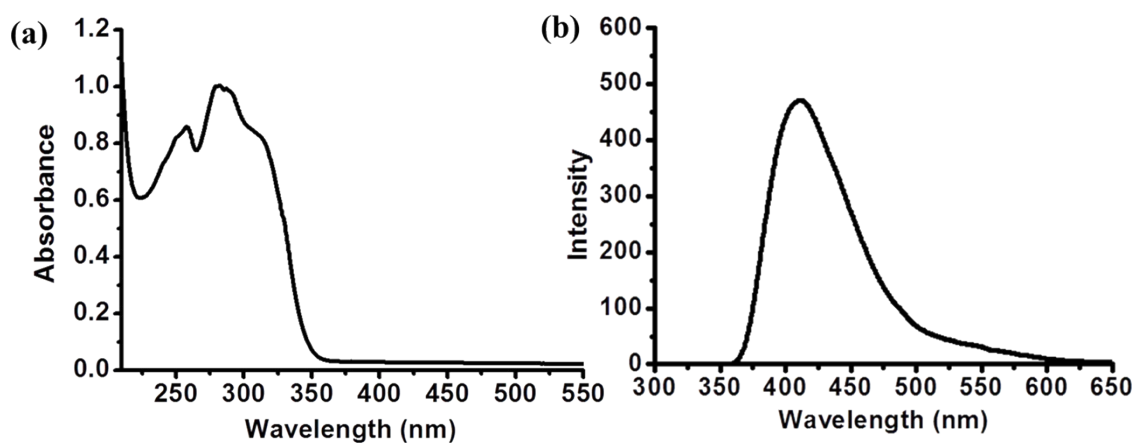

**Fig. S6** (a) Absorption spectra of **L** ( $1 \times 10^{-4}$  M) in MeOH, (b) emission spectra of **L** ( $1 \times 10^{-4}$  M) in MeOH.

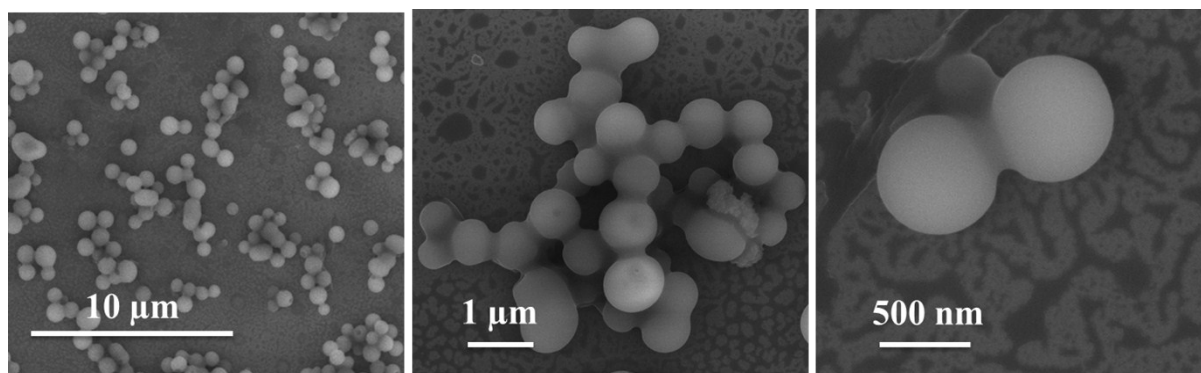

**Fig. S7** FESEM images of **HG** xerogel showing formation of nano-sphere.

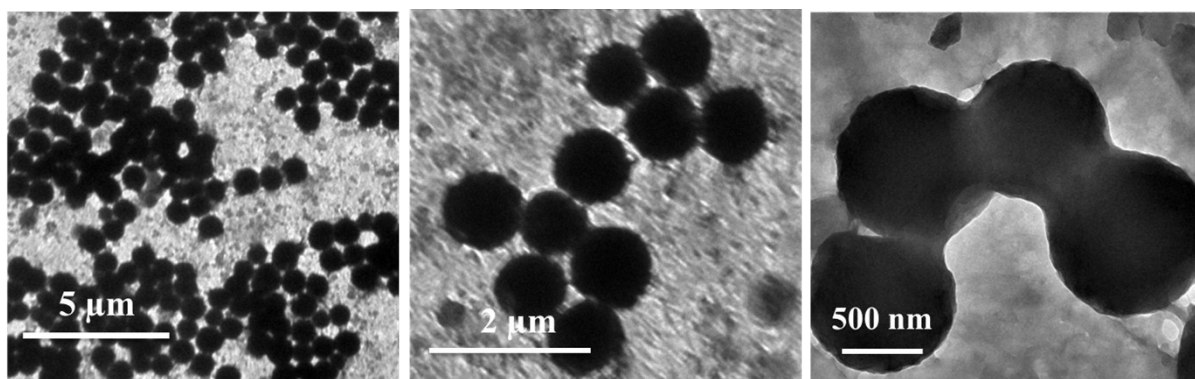

**Fig. S8** TEM images of **HG** xerogel showing formation of nano-sphere.

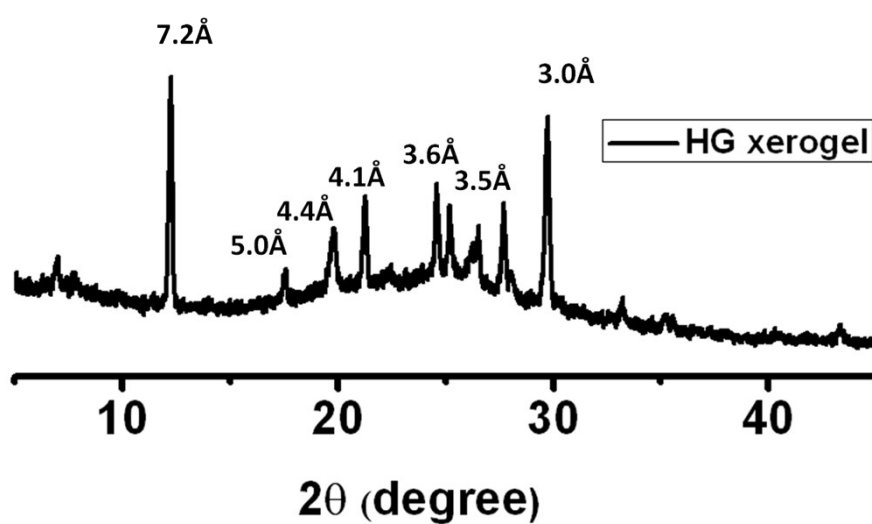

**Fig. S9** PXRD of **HG** xerogel.  $2\theta = 24.5^\circ$  ( $d = 3.6 \text{ \AA}$ ) indicates  $\pi$ - $\pi$  stacking in **HG** xerogel.

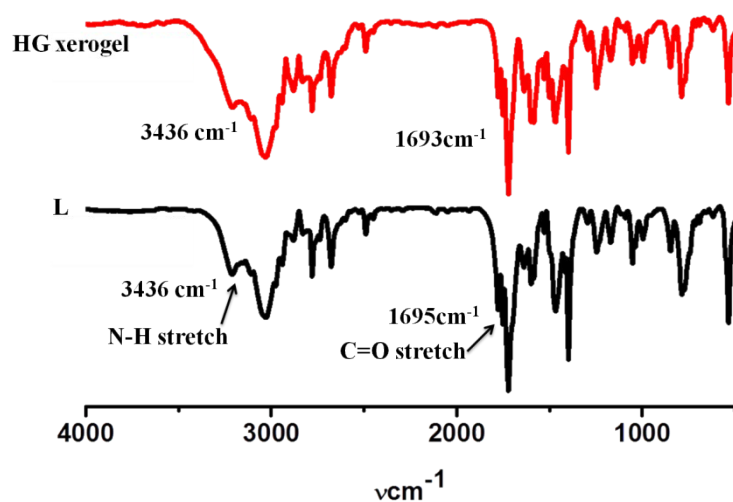

**Fig. S10** FTIR spectra of **L** (black) and **HG xerogel** (red).

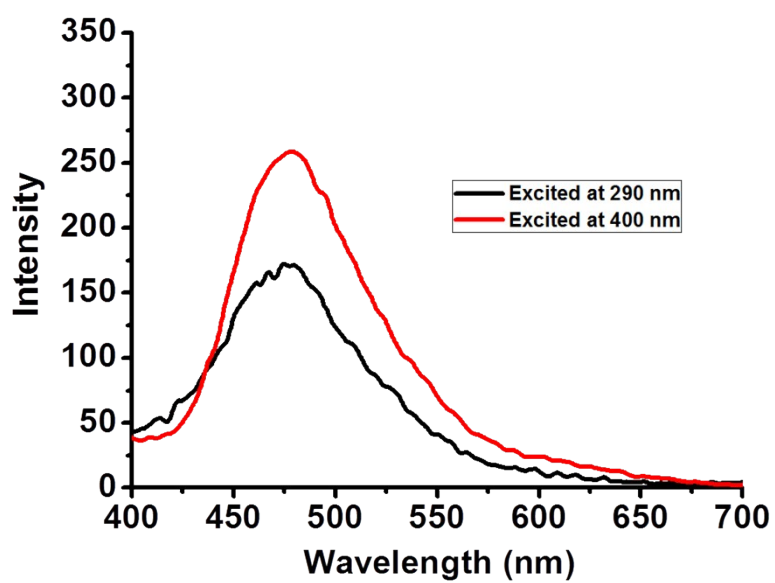

**Fig. S11** Emission spectra of **HG xerogel** when excited at 290 nm (black) and 400 nm (red).

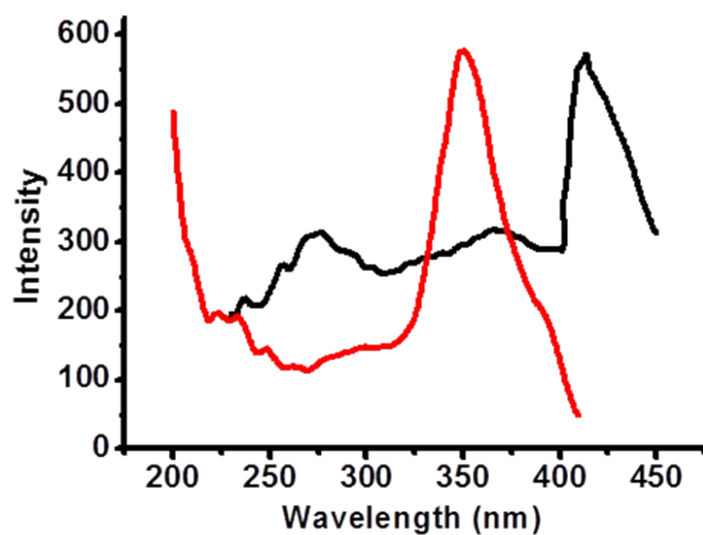

**Fig. S12** Comparison of excitation spectra of **L** (red) and **HG** xerogel (black).

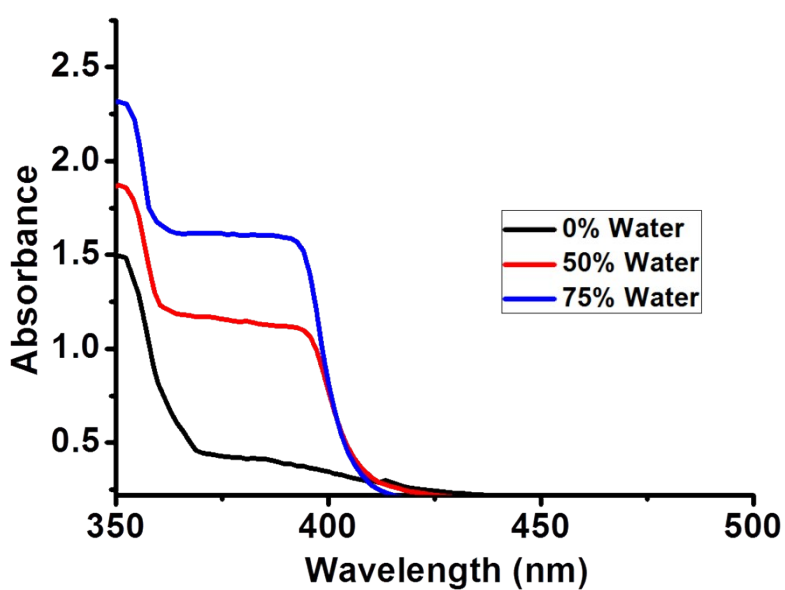

**Fig. S13** Change in absorption spectra of methanolic solution of **L** with incremental addition of water.

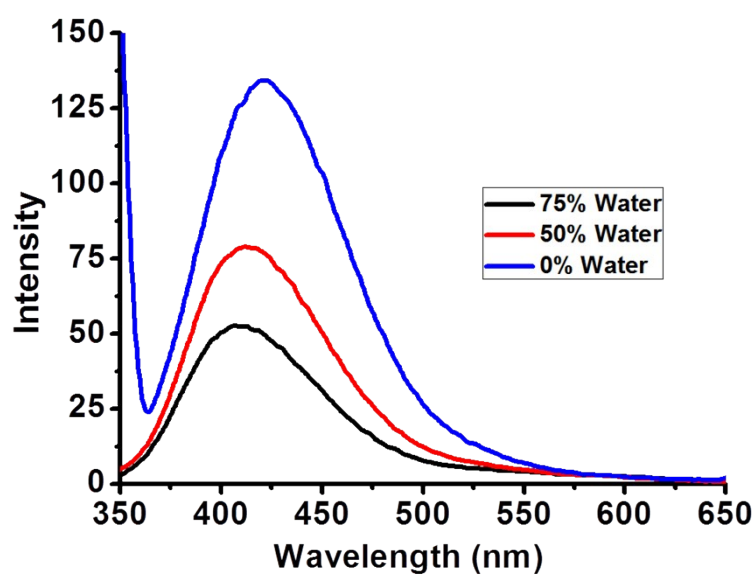

**Fig. S14** Change in emission spectra of methanolic solution of **L** with incremental addition of water.

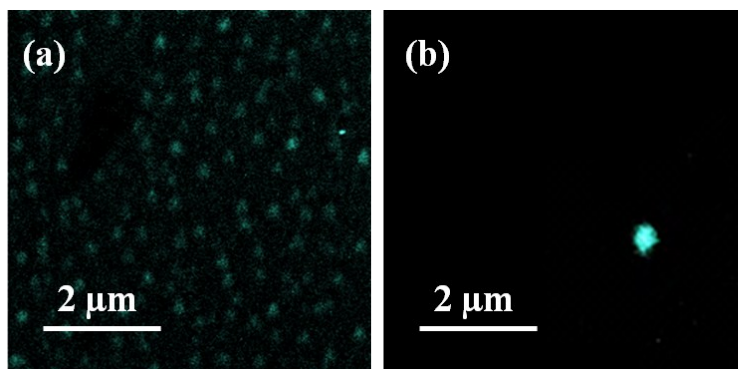

**Fig. S15** Confocal fluorescence microscopy images of **HG** xerogel showing presence of cyan emissive nano-spheres.

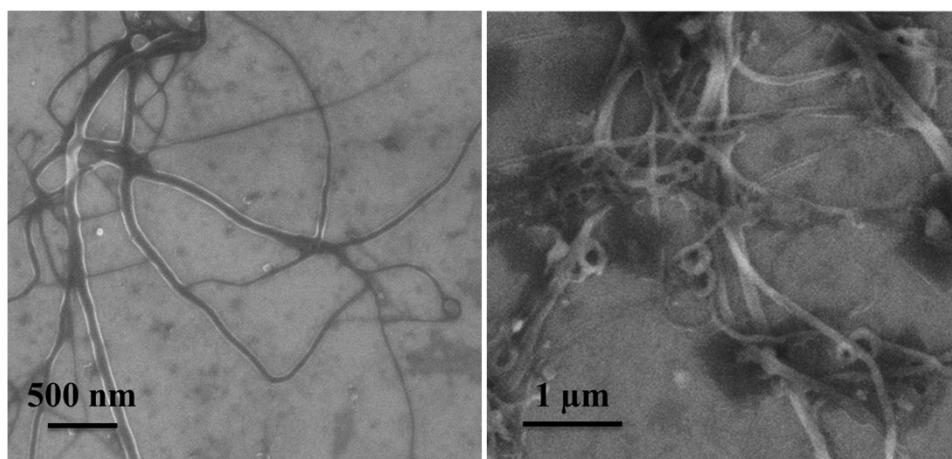

**Fig. S16** FESEM images of **OG** xerogel

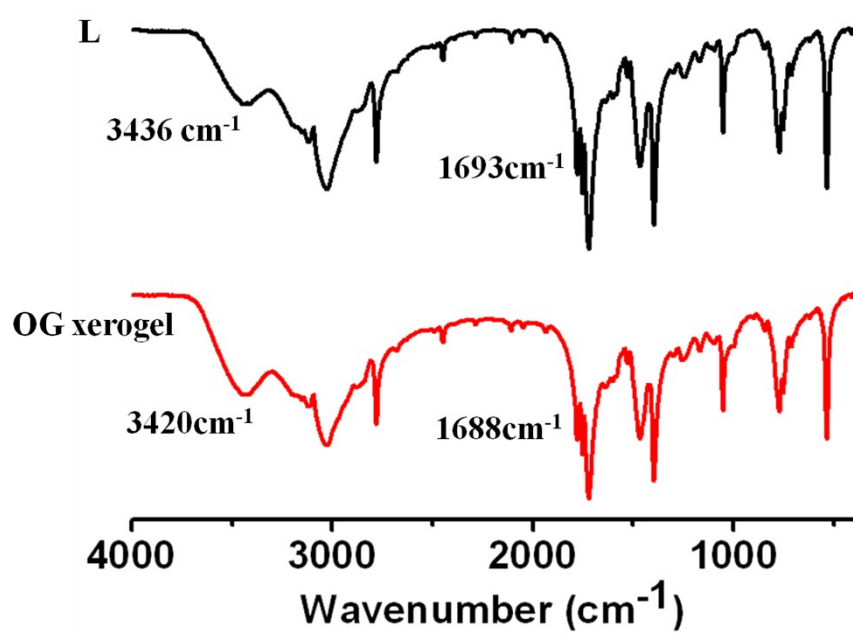

**Fig. S17** FTIR spectra of **L** (black) and **OG** xerogel (red).

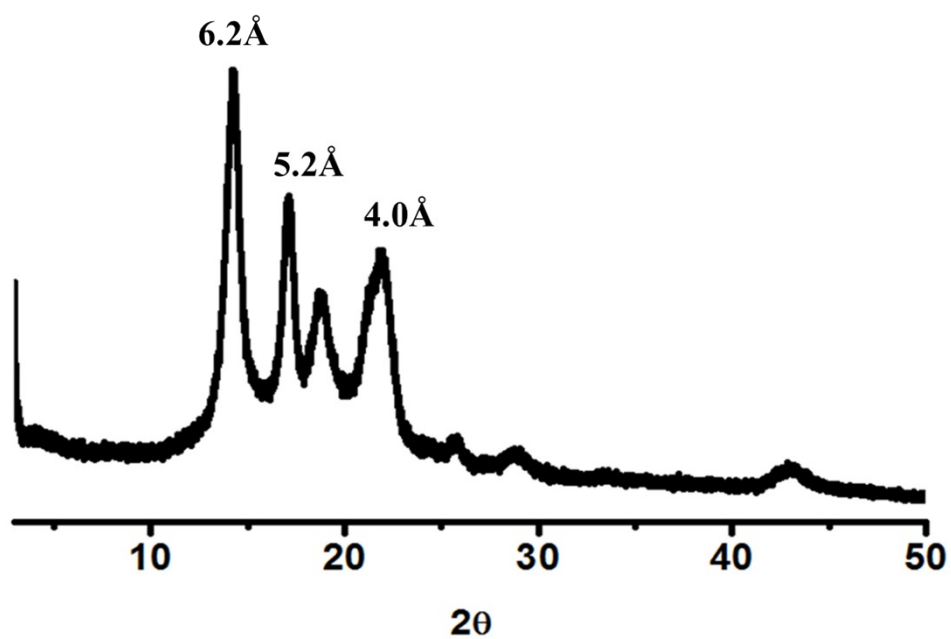

**Fig. S18** PXRD of OG xerogel.

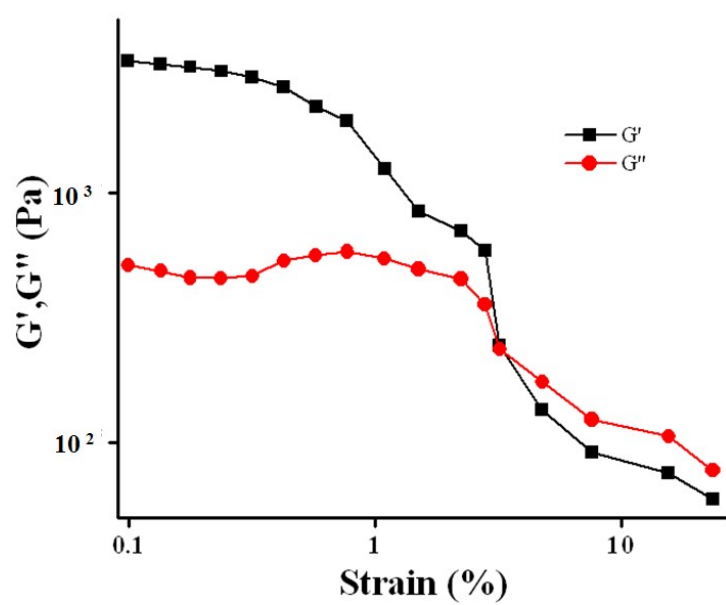

**Fig. S19** Oscillatory strain measurements (frequency=1.0 rad/s) of **HG**, the squares (black) and circles (red) indicate storage ( $G'$ ) and loss modulus ( $G''$ ) respectively.

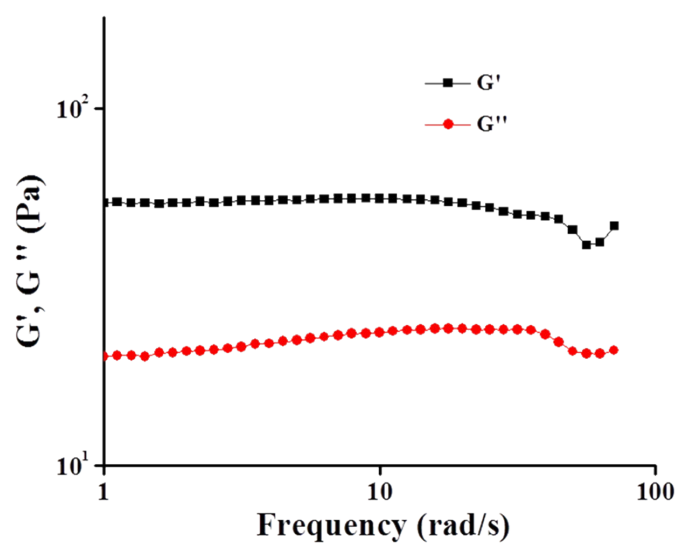

**Fig. S20** Oscillatory frequency sweep measurements (strain = 0.01%) of **HG**, the squares (black) and circles (red) indicate storage ( $G'$ ) and loss modulus ( $G''$ ) respectively.

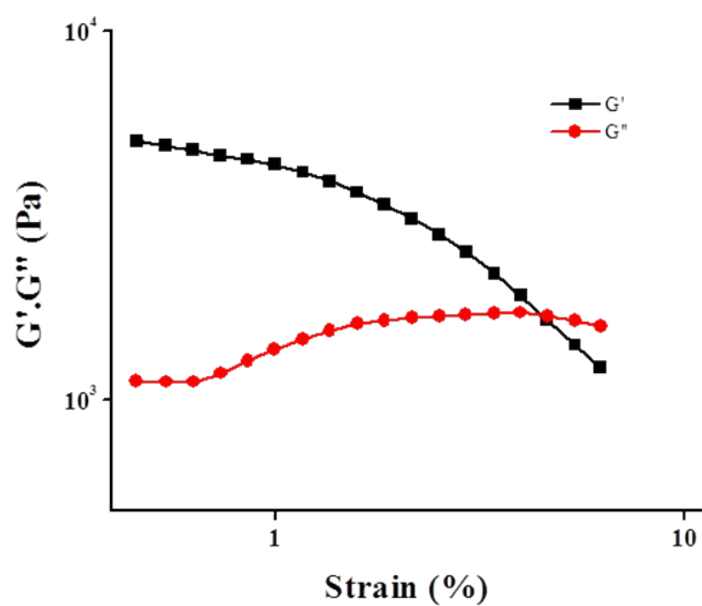

**Fig. S21** Oscillatory strain sweep measurements (frequency=1.0 rad/s) of **OG**, the squares (black) and circles (red) indicate storage ( $G'$ ) and loss modulus ( $G''$ ) respectively..

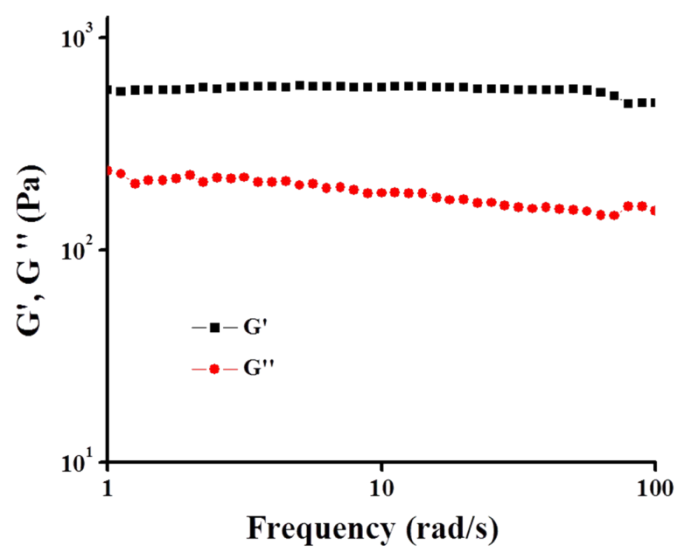

**Fig. S22** Oscillatory frequency sweep measurements (strain = 0.01%) of **OG**, the squares (black) and circles (red) indicate storage ( $G'$ ) and loss modulus ( $G''$ ) respectively.

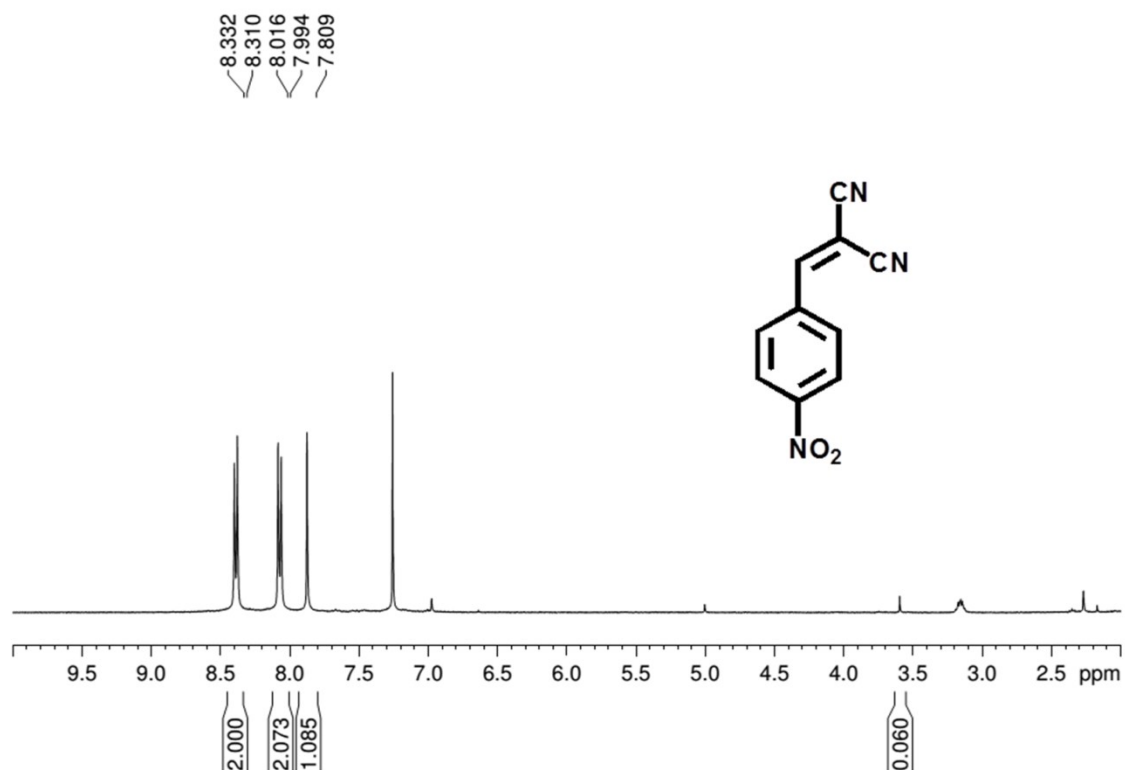

**Fig. S23** <sup>1</sup>H-NMR spectra (in CDCl<sub>3</sub>) of 2-(4-nitrobenzylidene)malononitrile formed by the condensation of malononitrile and 4-nitrobenzaldehyde using **HG** xerogel as catalyst.

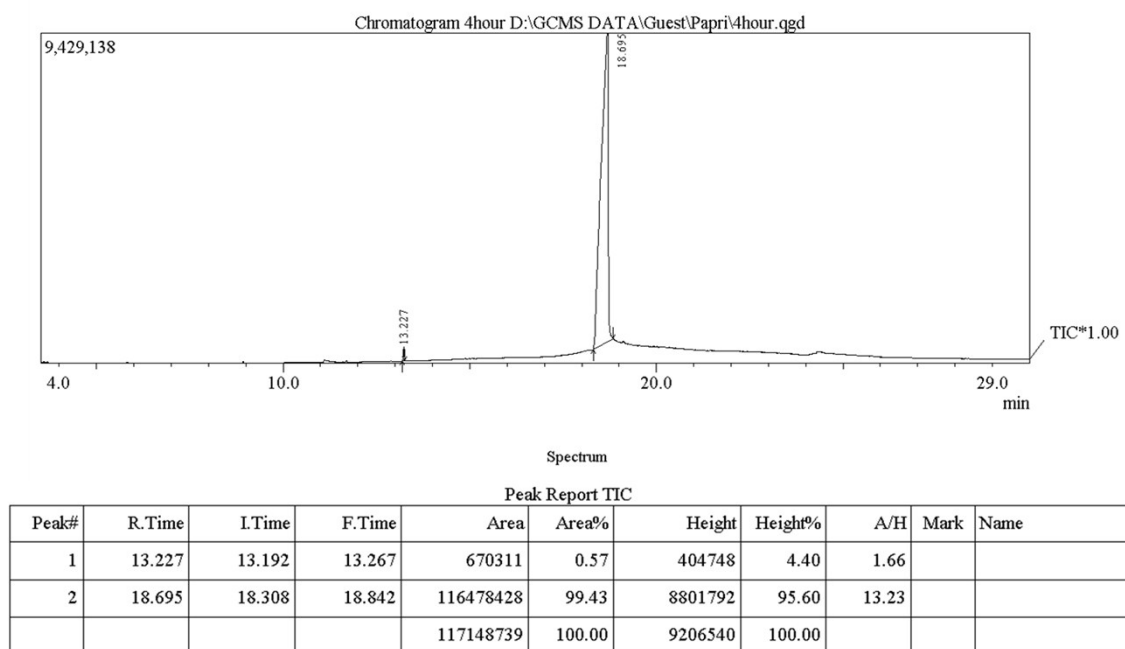

**Fig. S24** GC-MS of 2-(4-nitrobenzylidene)malononitrile formed by the condensation of malononitrile and 4-nitrobenzaldehyde after 4 hours using **HG** xerogel as catalyst.

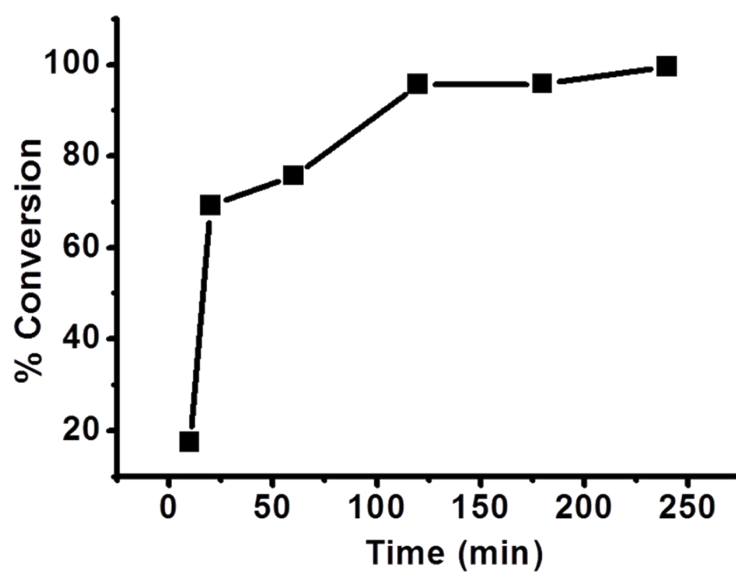

**Fig. S25** Conversion [%] versus time [min] for Knoevenagel condensation reaction of 4-nitrobenzaldehyde and malononitrile at 40°C in THF.

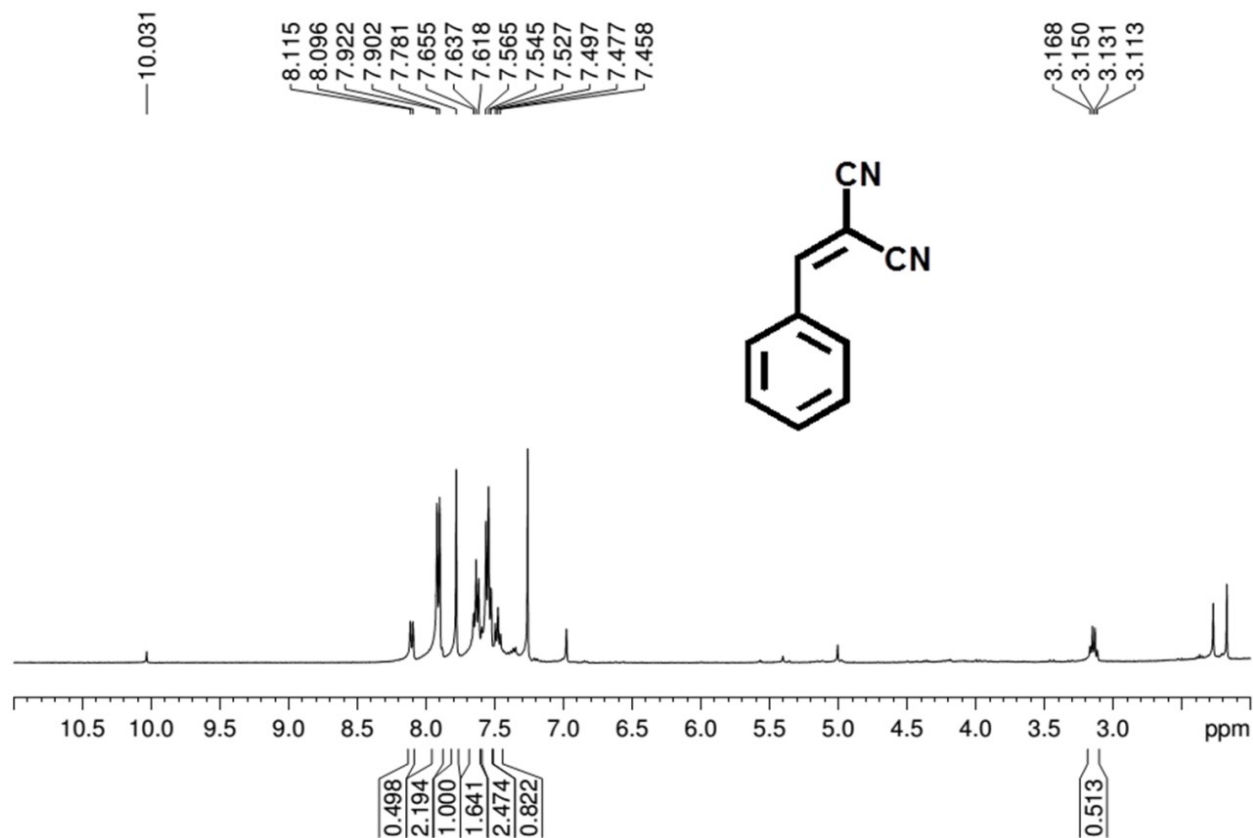

**Fig. S26** <sup>1</sup>H-NMR spectra (in CDCl<sub>3</sub>) of 2-benzylidenemalononitrile formed by the condensation of malononitrile and benzaldehyde using **HG** xerogel as catalyst.

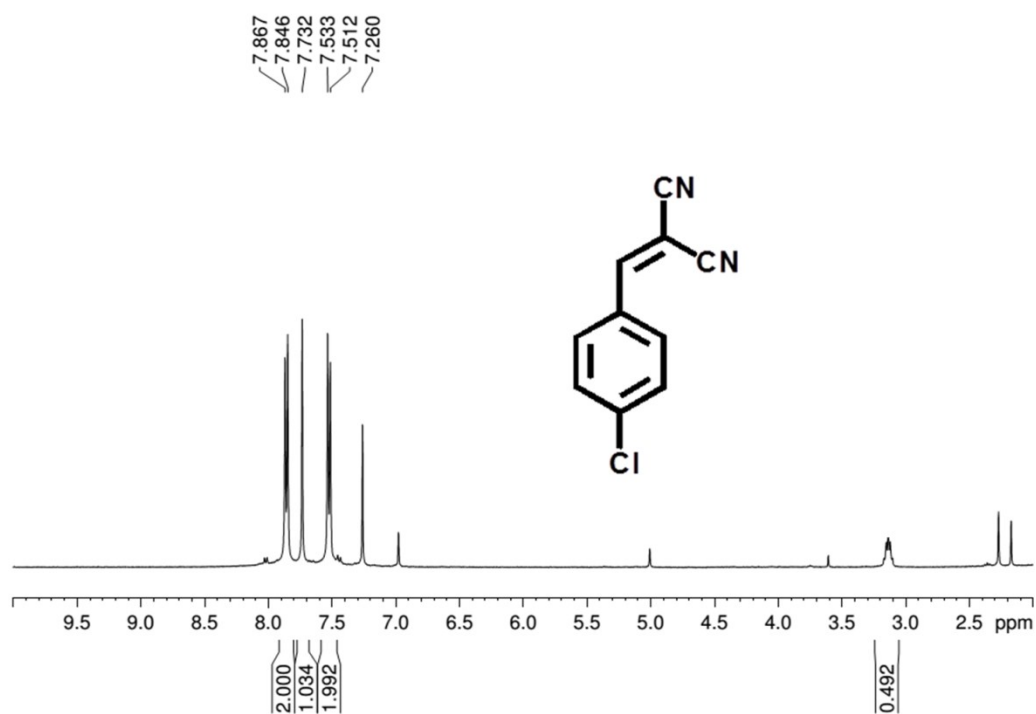

**Fig. S27**  $^1\text{H}$ -NMR spectra (in  $\text{CDCl}_3$ ) of 2-(4-chlorobenzylidene)malononitrile formed by the condensation of malononitrile and 4-chlorobenzaldehyde using **HG** xerogel as catalyst.

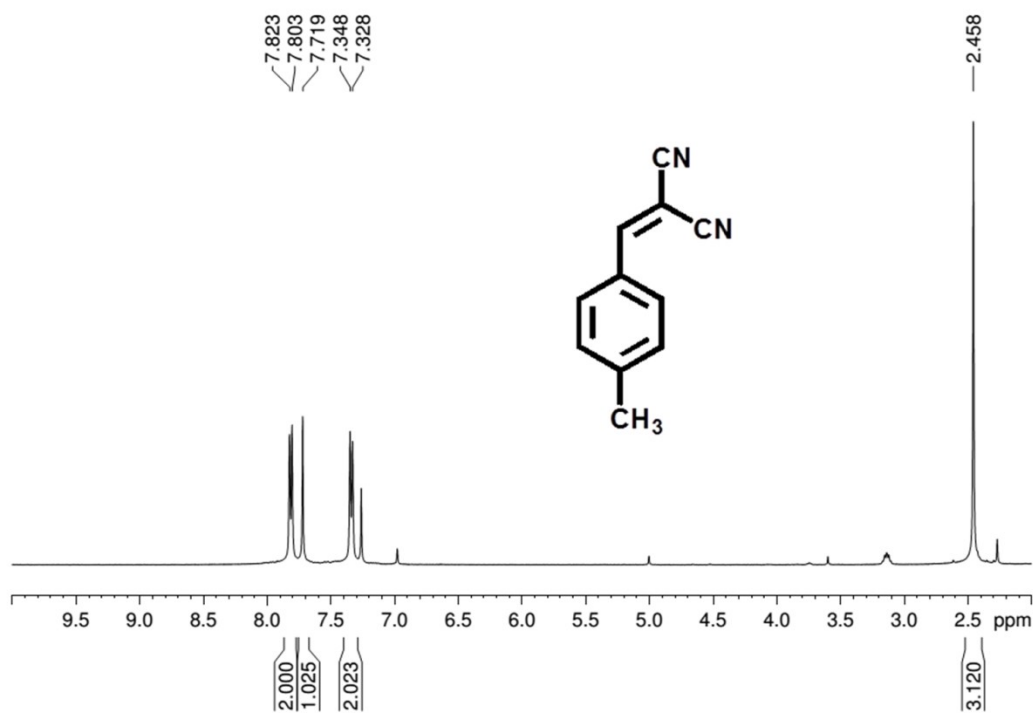

**Fig. S28**  $^1\text{H}$ -NMR spectra (in  $\text{CDCl}_3$ ) of 2-(4-methylbenzylidene)malononitrile formed by the condensation of malononitrile and p-tolualdehyde using **HG** xerogel as catalyst.

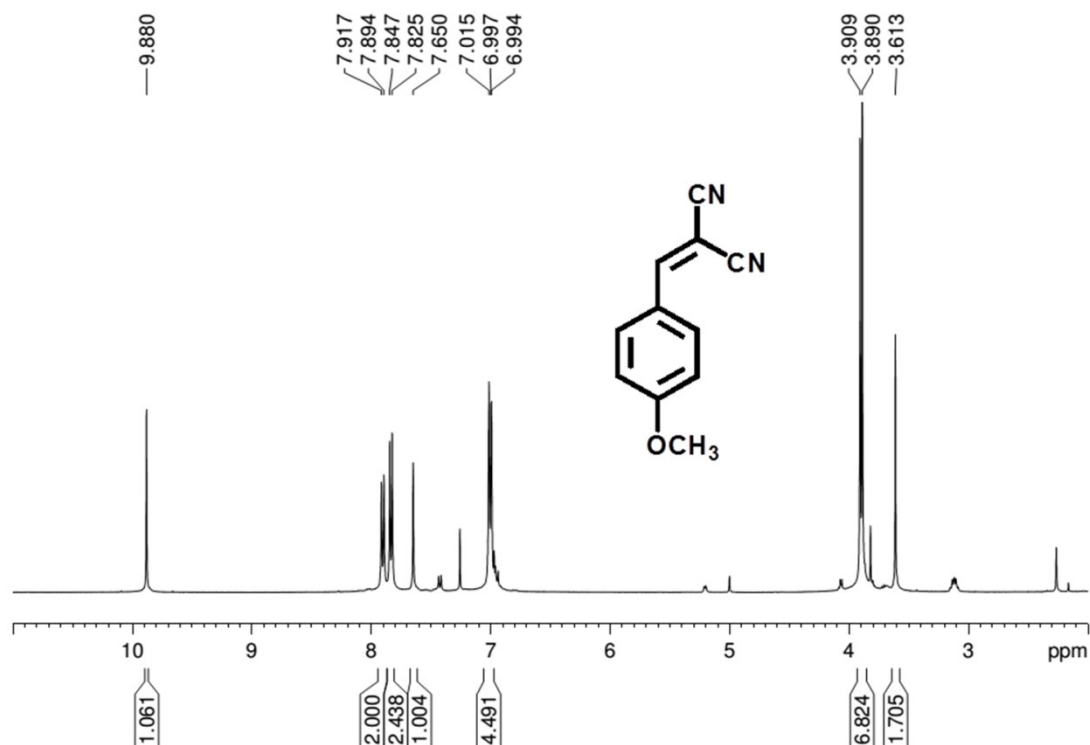

**Fig. S29** <sup>1</sup>H-NMR spectra (in CDCl<sub>3</sub>) of 2-(4-methoxybenzylidene)malononitrile formed by the condensation of malononitrile and p-anisaldehyde using **HG** xerogel as catalyst.

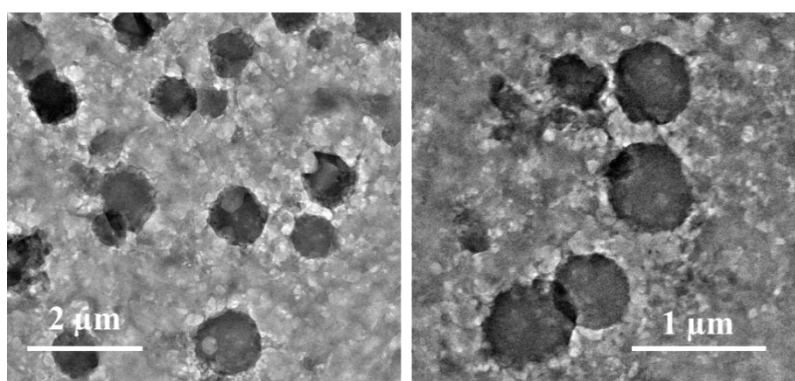

**Fig. S30** TEM images of **HG** xerogel after 4<sup>th</sup> cycle of catalytic reaction.

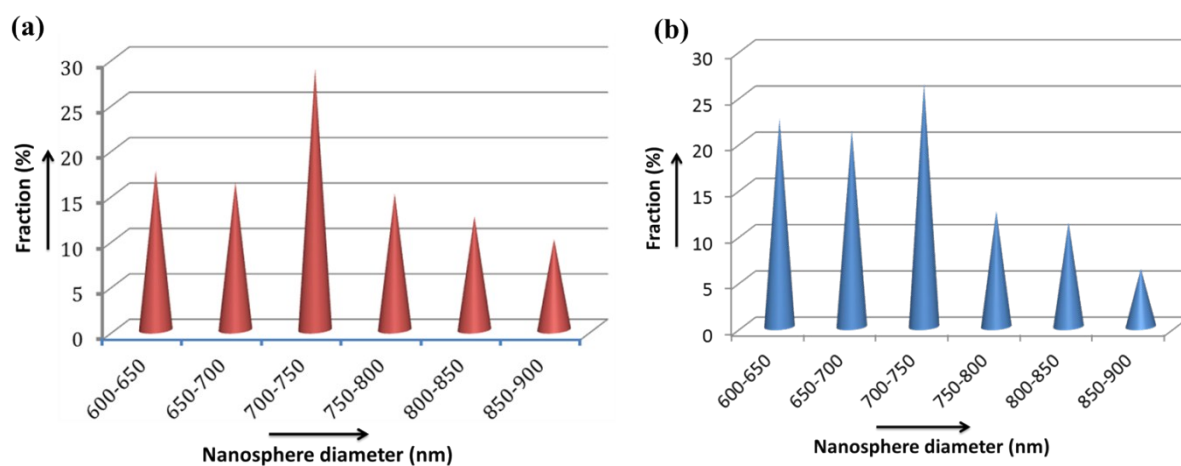

**Fig. S31** (a) Size distribution histogram plot of **HG** xerogel before catalytic reaction, (b) Size distribution histogram plot of **HG** xerogel-catalyst, recovered after 4<sup>th</sup> cycle of catalytic reaction.

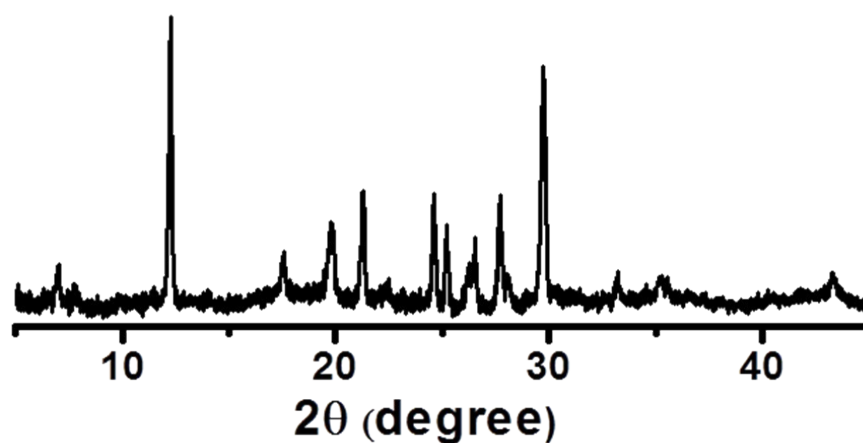

**Fig. S32** PXRD pattern of **HG** xerogel (HG@THF) after immersed in THF for 6 hours at 40°C.

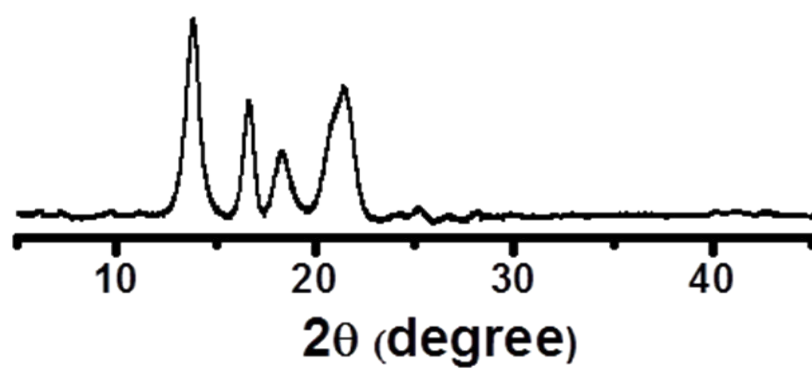

**Fig. S33** PXRD pattern of **OG** xerogel (OG@THF) after immersed in THF for 6 hours at 40°C.

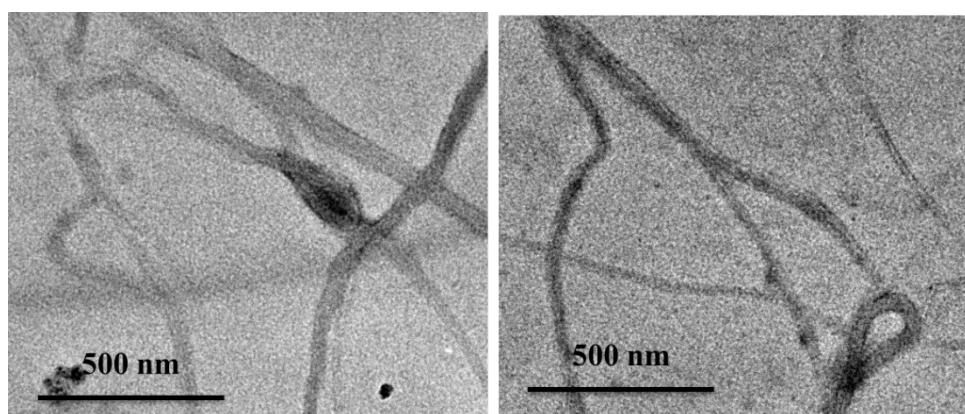

**Fig. S34** TEM image of **OG** xerogel after immersed in THF for 6 hours at 40°C.
